# Supplementary material for: The Effects of Menstrual Cycle Phase on Elite Athlete Performance: A Critical and Systematic Review
Source: Front Physiol. 2021 May 19;12:654585. doi: 10.3389/fphys.2021.654585 (PMC8170151; doi:10.3389/fphys.2021.654585)
Supplement: Supplementary Table 1 — Critical appraisal score and levels of evidence of each included study using modified Downs and Black critical appraisal checklist (Downs and Black, 1998). UTD, unable to determine; N/A, not applicable. [file Table_1.XLSX]

## Sheet: Table 1
		Myklebust et al. 1998	Kishali et al. 2005	Julian et al. 2017	Crewther at al. 2018	Tounsi et al. 2018	Julian et al. 2020	Statham et al. 2020
REPORTING
Q1	Hypothesis/aim/objective clearly described	1	1	1	1	1	1	1
Q2	Main outcomes in Introduction or Methods	1	0	1	1	1	1	1
Q3	Patient characteristics clearly described	1	1	1	1	1	1	1
Q4	Interventions of interest clearly described	N/A	N/A	1	1	1	N/A	1
Q5	Principal confounders clearly described	1	1	2	1	1	1	2
Q6	Main findings clearly described	1	1	1	1	1	1	1
Q7	Estimates of random variability provided for main outcomes	1	1	1	1	1	1	1
Q8	All adverse events of intervention reported	N/A	N/A	1	1	1	N/A	1
Q9	Characteristics of patients lost to follow-up described	N/A	1	UTD	1	UTD	1	1
Q10	Probability values reported for main outcomes	1		1	1	1	1	1
EXTERNAL VALIDITY
Q11	Subjects asked to participate were representative of source population	0	0	0	0	0	0	0
Q12	Subjects prepared to participate were representative of source population	1	1	0	0	0	0	0
Q13	Location and delivery of study treatment was representative of source population	N/A	N/A	0	0	0	N/A	0
INTERNAL VALIDITY; BIAS; CONFOUNDING
Q14	Study participants blinded to treatment	N/A	N/A	0	0	0	N/A	0
Q15	Blinded outcome assessment	N/A	N/A	1	1	1	N/A	1
Q16	Any data dredging clearly described	1	1	1	1	1	1	N/A
Q17	Analyses adjust for differing lengths of follow-up	1	1	1	1	1	1	1
Q18	Appropriate statistical tests performed	1	1	1	1	1	1	1
Q19	Compliance with interventions was reliable	N/A	N/A	1	1	1	N/A	1
Q20	Outcome measures were reliable and valid	1	1	1	1	1	1	1
Q21	All participants recruited from the same source population	1	1	0	0	0	0	0
Q22	All participants recruited over the same time period	N/A	1	1	1	1	1	1
Q23	Participants randomized to treatment(s)	N/A	N/A	0	UTD	0	N/A	0
Q24	Allocation of treatment concealed from investigators and participants	N/A	0	0	0	0	N/A	0
Q25	Adequate adjustment for confounding	0	0	1	1	1	1	1
Q26	Losses to follow-up taken into account	1	1	UTD	1	UTD	UTD	1
POWER
Q27	Sufficient power to detect treatment effect at significance level of 0.05	1	0	0	0	0	0	0
Total score		15	14	18	19	17	14	19
Maximum rate possible		18	21	28	28	28	20	27
Kennelly score (%)		83.3333	66.6667	64.2857	67.8571	60.7143	70	70.3704
