# Supplementary material for: The Effects of Menstrual Cycle Phase on Elite Athlete Performance: A Critical and Systematic Review
Source: Front Physiol. 2021 May 19;12:654585. doi: 10.3389/fphys.2021.654585 (PMC8170151; doi:10.3389/fphys.2021.654585)
Supplement: Supplementary Table 2 — Synthesis of analyzed publications that meet all inclusion criteria. Results expressed as means ± SDs. Kg, kilograms; m, meters; min, minutes; s, seconds; #: number. [file Table_2.XLSX]

## Sheet: Table 2
Study	Sport	Athletes (#)	Age (years)	Duration	Type	Parameter studied	Test	early follicular phase (menses)		Follicular Phase (7-14)		Luteal Phase (15-28)		Statistical significance: P			Conclusion
								morning	afternoon	morning	afternoon	morning	afternoon
Julian et al. 2017	Soccer	9	18.6 ± 3.8	8 weeks	Physical test on artificial turf	Body mass	Weight (kg)			59.1 ± 7.7		58.8 ± 7.5					Yo-Yo IET performance was affected during the LP of the menstrual cycle. However, in all other aspect of measured performance were not different between phases. did not indicate any differences in lactate production at rest or at maximal lactate concentration. Sprinting performance in the present study did not differ between cycle phases at either split or full 30 m distance. The current study in…
					Blood sampling	Body fat	Body fat (%)			17.7 ± 2.5		17.8 ± 2.2
					Calendar mapping of menses	Hormone levels	Oestrogen (pg/ml)			26.8 ± 22.1		109.8 ± 55.6*		P < 0.05
						Hormone levels	Progesterone (nmol/l)			2.2 ± 0.6		6.5 ± 2.0*		P < 0.05
						Sprinting capability	3x30m sprints, time after 5m (s)			1.1 ± 0.1		1.1 ± 0.1		1
						Sprinting capability	3x30m sprints, time after 10m (s)			1.9 ± 0.1		1.9 ± 0.1		0.25
						Sprinting capability	3x30m sprints, time after 30m (s)			4.7 ± 0.1		4.7 ± 0.1		0.96
						Lower limb power	Counter movement jump (cm)			29.0 ± 3.9		29.6 ± 3.0		0.33
						Endurance capacity	Yo-Yo Intermittent endurance test (m)			3289 ± 801		2822 ± 896		0.07
						Heart rate	HR Pre (bpm)			97 ± 16		105 ± 12		0.04
						Heart rate	Hrpost (bpm)			194±4		193±5		0.9
						Record of perceived exertion	RPE (AU)			18.7 ± 0.7		18.6 ± 0.9		0.76
						Recuperation capacity	Lactate pre (mmol L-1)			2.3 ± 0.8		2.1 ± 0.8		0.65
						Recuperation capacity	Lactate 1min post (mmol/L)			9.3 ± 1.4		8.6 ± 0.7		0.2
						Recuperation capacity	Lactate 3min post (mmol/L)			8.8 ± 2.2		7.6 ± 1.6		0.01
						Recuperation capacity	Lactate 5min post (mmol/L)			8.7 ± 2.2		6.9 ± 1.9		0.03
Crewther at al. 2018	Triathlon, Body shaping, Swimming,	9	20.7 ± 1.3	3 months	Questionnaire	Competitivness	Score (1=no desire/7=extremely competitive)	5		3.5		4					sal-T linkage to competitiveness in elite
	Rugby, Net-ball, Soccer				Salivary sampling	Hormone levels	Salivary testosterone concentration (pg/ml)	60		37		40
Myklebust et al. 1998	Handball	17	21.9 ± 3.4	1993-1996	Propective study	Anterior cruciate ligament injuries	Number of injuries / total players	5/17		2/17		10/17					A reliable menstrual history could be obtained in 17 of the 23 cases among females. Of these, 8 used oral contraceptives and 9 had regular menses. Five of the injuries occurred in the menstrual phase, 2 in the follicular phase, 1 in the early luteal phase and 9 in the late luteal phase (chi-square3 & f . =13.2; P<O.01;. Many of the women sustained ACL injuries dur- ing the weeks prior to or after…
Julian et al. 2020	Soccer	15	23 ± 4	4 months	On-field (GPS)	Hormone levels	Oestrogen (pg/ml)			52.5 ± 37.3		189.6 ± 64.0		P < 0.01			76 individual match observations (ranging between four matches to seven matches per player, 36 in FP and 40 in LP) were recorded . No Relationships between Hormone Concentrations and Physical Performance. Although in our fifteen elite female players, MCP was suggested to have an influence on distance covered in Zone 3, with 0.74 m.min-1 more distance covered in the LP. It remains difficult to dra…
					Blood sampling	Hormone levels	Progesterone (ng/l)			0.4 ± 0.3		6.4 ± 3.9		P < 0.01
						Physical performances	Total distance (m/min)			103.00 ± 7.69		103.89 ± 6.84		0.53
						Distance covered per minute at low intensity	Zone 1 (m/min)			82.03 ± 7.47		81.65 ± 5.73		0.36
						Distance covered per minute at very intensity	Zone 2 (m/min)			11.41 ± 3.40		11.61 ± 3.27		0.29
						Distance covered per minute at high intensity	Zone 3 (m/min)			5.90 ± 2.16		6.64 ± 2.72		0.02
						Distance covered per minute when sprinting	Zone 4 (m/min)			3.73 ± 2.38		3.99 ± 2.03		0.31
						Power output	High intensity bouts (#)			150 ± 29		157 ± 29		0.09
							Sprinting bouts (#)			23 ± 13		25 ± 12		0.21
Statham et al. 2020		8		7 months	Physical test	Physiological data	Average power (Naturally menstruating)	not significantly different						0.27			menstrual cycle phase has an effect on training performance. Across the group there was an improvement in the MP compared to the PSP, the effects being more pronounced in the OC group. On an individual basis, there is a wide spectrum of severity in terms of the effects, with some elite athletes signif- icantly affected and others not. Conversely, the changes in cognitive behavior suggest that per…
					Urine ovulation test	Physiological data	Average power (Oral contraceptive user)	significantly higher						P < 0.05
		4			Calendar mapping of menses	Decision making	Impulsivity	greater						P < 0.05
						Decision making	Risk taking	no significant effect						0.69
						Decision making	Response time	no significant effect						0.53
						Decision making	Error rates	no significant effect						1
Tounsi et al. 2018	Soccer	11	21.18 ± 3.15		Blood sampling	Lower limb power	Five-Jump Test (m)	8.71±0.60	9.09±0.68	8.63±0.52	9.11±0.58	8.45±0.57	9.04±0.51	Cycle phase: NS Moment of day: p<0.001 Interaction: NS			Soccer-specific endurance as well as repeated-sprint- ing and jumping ability of female Tunisian high-level soccer players are not affected due to menstrual cy- cle phase neither in the morning nor in the afternoon. furthermore, repeated-sprinting and jumping perfor- mances are better in the afternoon than the morning irrespective of the menstrual cycle phase, while soc- cer-specific endurance do…
					Physical test	Sprinting capability	Repeated Shuttle-Sprint Ability test (s)	8.89±0.31	8.55±0.28	8.71±0.38	8.50±0.26	8.71±0.32	8.40±0.28	Cycle phase: NS Moment of day: p<0.001 Interaction: NS
						Endurance capacity	Yo-Yo Intermittent Recovery Test (m)	901.82±405.31	905.45±386.69	843.64±324.69	865.45±365.41	894.55±406.46	894.55±305.3	Cycle phase: NS Moment of day: NS Interaction: NS
Kishali et al. 2005	Teak-wondo	48	20.71 ± 0.41		Questionnaire	Body mass	Weight (kg)			57.02 ± 1.36		57.46 ± 1.38
						Feeling	Period of felling worse (% of athletes)	29.17		70.83 (just after)		70.83 (just before mens.)
	Judo	76	16.91 ± 0.27		Questionnaire	Body mass	Weight (kg)			59.45 ± 1.17		60.33 ± 1.18
						Feeling	Period of felling worse (% of athletes)	39.47		60.53 (just after)		60.53 (just before mens.)
	Volleyball	81	21.22 ± 0.26		Questionnaire	Body mass	Weight (kg)			61.23 ± 0.69		61.75 ± 0.71
						Feeling	Period of felling worse (% of athletes)	18.52		81.48 (just after)		81.48 (just before mens.)
	Basketball	36	21.03 ± 0.63		Questionnaire	Body mass	Weight (kg)			64.53 ± 1.41		65.31 ± 1.45
						Feeling	Period of felling worse (% of athletes)	30.56		69.44 (just after)		69.44 (just before mens.)
TOTAL		314	20.58 ± 1.91
